# Supplementary material for: Triazine–polycarboxylic acid complexes: synthesis, structure and photocatalytic activity
Source: Royal Society of Chemistry journal article supplement (doi:10.1039/c5nj00173k), 2015-01-01
Supplement: c5nj00173k1.pdf [file c5nj00173k1.pdf]

## <Journal Name>New Journal of Chemistry

### Supporting Information

## Triazine-polycarboxylate acids complexes: synthesis, crystal structure and photocatalytic activity

Zhi Nan Wang<sup>a</sup>, Xuan Wang<sup>a, b</sup>, Si Yue Wei<sup>a</sup>, Ji Xiao Wang<sup>a</sup>, Feng Ying Bai<sup>c</sup>, Yong Heng Xing<sup>\*a</sup> and Li Xian Sun<sup>d</sup>

<sup>a</sup> College of Chemistry and Chemical engineering, Liaoning Normal University, Huanghe Road 850#, Dalian City, 116029, P.R. China.

<sup>b</sup> Laboratory for Corrosion and Protection, Institute of Metal Research, Chinese Academy of Sciences, Shenyang City, 110016, P.R. China.

<sup>c</sup> College of Life Science, Liaoning Normal University, Dalian 116029, P.R. China.

<sup>d</sup> Guangxi Key Laboratory of Information Materials, Guilin University of Electronic Technology, Guilin 541004, P.R. China

\* E-mail address: xingyongheng2000@163.com; Tel: 0411-82156987

#### Scheme, Figure and Table titles:

**Table S1.** Crystallographic data and the structure refinement of complex **3**

**Table S2.** Selected bond lengths (Å) and angles (°) for the complexes **1**, **2** and **4**

**Table S3.** Hydrogen bonds (Å) and angles (°) of the complexes **1**, **2** and **4**\*

**Fig. S1.** IR absorption spectrum of complex **1**

**Fig. S2.** IR absorption spectrum of complex **2**

**Fig. S3.** IR absorption spectrum of complex **3**

**Fig. S4.** IR absorption spectrum of complex **4**

**Fig. S5.** UV-vis absorption spectrum of complex **1**

**Fig. S6.** UV-vis absorption spectrum of complex **2**

**Fig. S7.** UV-vis absorption spectrum of complex **3**

**Fig. S8.** UV-vis absorption spectrum of complex **4**

**Fig. S9.** TG curves of the complex **1**

**Fig. S10.** TG curves of the complex **2**

**Fig. S11.** TG curves of the complex **3**

**Fig. S12.** TG curves of the complex **4**

**Fig. S13.** The view of 1D chain of complex **1** (All H atoms are omitted for clarity)

**Fig. S14.** The view of 1D chain of complex **2** (All H atoms are omitted for clarity)

**Fig. S15.** The view of 1D chain via hydrogen bonds in complex **4** (All H atoms expert for the hydrogen bonds are omitted for clarity; Symmetry codes: #4: -1+x, 1+y, z)

**Fig. S16.** The view of 3D network structure via hydrogen bonds in complex **4** (All H atoms expert for the hydrogen bonds are omitted for clarity; Symmetry codes: #1: 2-x, -y, 1-z; #2: 1+x, -1+y, z; #3: 1+x, y, z; #4: -1+x, 1+y, z; #5: 1-x, 1-y, 1-z)

**Table S1.** Crystallographic data and the structure refinement of complex **3**

| Complex                                 | 3                                                                 |
|-----------------------------------------|-------------------------------------------------------------------|
| Formula                                 | C <sub>32</sub> H <sub>36</sub> N <sub>10</sub> O <sub>8</sub> Zn |
| M (g·mol <sup>-1</sup> )                | 754.08                                                            |
| Crystal system                          | Triclinic                                                         |
| Space group                             | P-1                                                               |
| a (Å)                                   | 9.491(2)                                                          |
| b (Å)                                   | 13.025(3)                                                         |
| c (Å)                                   | 16.033(3)                                                         |
| α (°)                                   | 106.161(4)                                                        |
| β (°)                                   | 91.155(4)                                                         |
| γ (°)                                   | 109.772(3)                                                        |
| V(Å <sup>3</sup> )                      | 1777.1(6)                                                         |
| Z                                       | 2                                                                 |
| D <sub>calc</sub> (g·cm <sup>-3</sup> ) | 1.409                                                             |
| Crystal size (mm)                       | 0.44 × 0.23 × 0.12                                                |
| F(000)                                  | 784                                                               |
| M(Mo Kα) (mm <sup>-1</sup> )            | 0.755                                                             |
| θ (°)                                   | 2.30-22.80                                                        |
| Reflections collected                   | 7357                                                              |
| Independent reflections(I>2σ)           | 4757(2724)                                                        |
| Parameters                              | 469                                                               |
| Δ(ρ)(e Å <sup>-3</sup> )                | 0.346and-0.283                                                    |
| Goodness of fit (GOF) on F <sup>2</sup> | 1.027                                                             |
| R <sub>a</sub>                          | 0.0632(0.1205) <sup>b</sup>                                       |
| wR <sub>a</sub> 2                       | 0.1300(0.1570) <sup>b</sup>                                       |

$$^*R = \frac{\sum |F_o - F_c|}{\sum |F_o|}, wR_2 = \left\{ \frac{\sum [w(F_o^2 - F_c^2)^2]}{\sum [w(F_o^2)^2]} \right\}^{1/2}; [F_o > 4\sigma(F_o)].$$

<sup>b</sup>Based on all data.

**Table S2.** Selected bond lengths (Å) and angles (°) for the complexes **1**, **2** and **4**

---

| <b>Complex 1</b> |            |                   |            |
|------------------|------------|-------------------|------------|
| Zn-O(1)          | 1.940(2)   | Zn-O(2)           | 1.954(3)   |
| Zn-N(1)          | 2.052(2)   | Zn-N(3)           | 2.215(3)   |
| Zn-N(2)          | 2.229(2)   |                   |            |
| O(1)-Zn-O(2)     | 99.60(11)  | O(1)-Zn-N(1)      | 136.35(11) |
| O(2)-Zn-N(1)     | 124.05(11) | O(1)-Zn-N(3)      | 100.49(11) |
| O(2)-Zn-N(3)     | 101.53(12) | N(1)-Zn-N(3)      | 73.15(10)  |
| O(1)-Zn-N(2)     | 96.95(11)  | O(2)-Zn-N(2)      | 105.80(11) |
| N(1)-Zn-N(2)     | 72.82(10)  | N(3)-Zn-N(2)      | 144.43(10) |
| <b>Complex 2</b> |            |                   |            |
| Co-O(1)          | 1.986(5)   | Co-N(1)           | 2.029(6)   |
| Co-O(4)#1        | 2.015(5)   | Co-N(2)           | 2.196(7)   |
| Co-N(3)          | 2.125(7)   |                   |            |
| N(1)-Co-N(3)     | 75.6(3)    | O(4)#1-Co-N(3)    | 108.1(2)   |
| O(1)-Co-N(1)     | 129.6(2)   | O(1)-Co-N(2)      | 96.6(3)    |
| O(1)-Co-O(4)#1   | 98.6(2)    | N(1)-Co-N(2)      | 73.9(3)    |
| N(1)-Co-O(4)#1   | 130.3(2)   | O(4)#1-Co-N(2)    | 91.0(2)    |
| O(1)-Co-N(3)     | 103.6(2)   | N(3)-Co-N(2)      | 149.4(2)   |
| <b>Complex 4</b> |            |                   |            |
| Cu(1)-O(1)       | 1.940(2)   | Cu(1)-O(1W)       | 1.971(3)   |
| Cu(1)-N(2)       | 2.004(3)   | Cu(1)-N(1)        | 2.024(2)   |
| Cu(1)-O(2W)      | 2.306(2)   |                   |            |
| O(1)-Cu(1)-O(1W) | 89.81(9)   | O(1)-Cu(1)-N(2)   | 96.34(10)  |
| O(1W)-Cu(1)-N(2) | 171.35(10) | O(1)-Cu(1)-N(1)   | 171.61(10) |
| O(1W)-Cu(1)-N(1) | 93.44(10)  | N(2)-Cu(1)-N(1)   | 79.66(10)  |
| O(1)-Cu(1)-O(2W) | 91.66(9)   | O(1W)-Cu(1)-O(2W) | 88.12(10)  |
| N(2)-Cu(1)-O(2W) | 97.74(10)  | N(1)-Cu(1)-O(2W)  | 96.18(10)  |

---

**Table S3.** Hydrogen bonds (Å) and angles (°) of the complexes **1**, **2** and **4**\*

| D–H ⋯ A                      | <i>d</i> (D–H)/ Å | <i>d</i> (H ⋯ A)/ Å | <i>d</i> (D ⋯ A)/ Å | ∠D–H ⋯ A/ ° |
|------------------------------|-------------------|---------------------|---------------------|-------------|
| <b>Complex 1</b>             |                   |                     |                     |             |
| O7–H7 ⋯ O3                   | 0.82              | 1.88                | 2.688(4)            | 168.1       |
| O5–H5A ⋯ O7 <sup>#1</sup>    | 0.82              | 1.81                | 2.623(4)            | 173.5       |
| O8–H8 ⋯ O2 <sup>#2</sup>     | 0.82              | 2.19                | 2.998(9)            | 168.2       |
| C17–H17A ⋯ O8 <sup>#3</sup>  | 0.96              | 2.54                | 3.248(10)           | 131.1       |
| <b>Complex 2</b>             |                   |                     |                     |             |
| O5–H5 ⋯ O7 <sup>#1</sup>     | 0.82              | 1.87                | 2.637(12)           | 154.5       |
| C7–H7 ⋯ O2 <sup>#2</sup>     | 0.93              | 2.52                | 3.393(12)           | 157.2       |
| <b>Complex 4</b>             |                   |                     |                     |             |
| O1W–H1WA ⋯ O3                | 0.85              | 1.83                | 2.630(3)            | 155.1       |
| O3W–H3WA ⋯ O1W               | 0.85              | 2.14                | 2.980(4)            | 170.7       |
| O4W–H4WB ⋯ O8                | 0.85              | 2.01                | 2.701(3)            | 138.2       |
| O3W–H3WB ⋯ O5                | 0.85              | 1.94                | 2.640(3)            | 138.9       |
| O6W–H6WB ⋯ O4                | 0.85              | 2.07                | 2.897(4)            | 164.2       |
| N6–H6 ⋯ O6 <sup>#1</sup>     | 0.86              | 1.99                | 2.841(3)            | 172.2       |
| N8–H8 ⋯ O5W <sup>#2</sup>    | 0.86              | 1.98                | 2.822(4)            | 165.4       |
| O1W–H1WB ⋯ O6W <sup>#3</sup> | 0.85              | 1.79                | 2.628(4)            | 170.9       |
| O2W–H2WA ⋯ O6 <sup>#4</sup>  | 0.85              | 2.34                | 2.936(4)            | 127.3       |
| O2W–H2WA ⋯ N9 <sup>#4</sup>  | 0.85              | 2.27                | 3.112(3)            | 172.2       |
| O2W–H2WB ⋯ O4 <sup>#5</sup>  | 0.85              | 1.96                | 2.805(3)            | 178.0       |
| O5W–H5WA ⋯ O5 <sup>#5</sup>  | 0.85              | 2.07                | 2.887(4)            | 160.0       |
| O5W–H5WB ⋯ O3 <sup>#5</sup>  | 0.85              | 2.05                | 2.815(3)            | 150.2       |

\*Symmetry transformation used to generate equivalent atoms: complex **1**: #1: -1-x, -1/2+y, -3/2-z; #2: -x, -1-y, -1-z; #3: x, -1/2-y, -1/2+z; complex **2**: #1: 1+x, y, z; #2: 3/2-x, -1/2+y, 3/2-z; complex **4**: #1: 2-x, -y, 1-z; #2: 1+x, -1+y, z; #3: 1+x, y, z; #4: -1+x, 1+y, z; #5: 1-x, 1-y, 1-z.

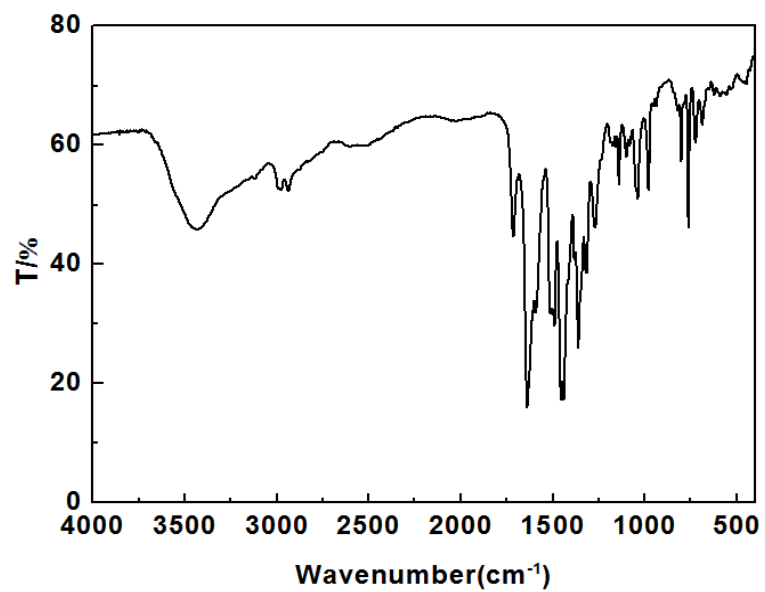

Fig. S1. IR absorption spectrum of complex 1

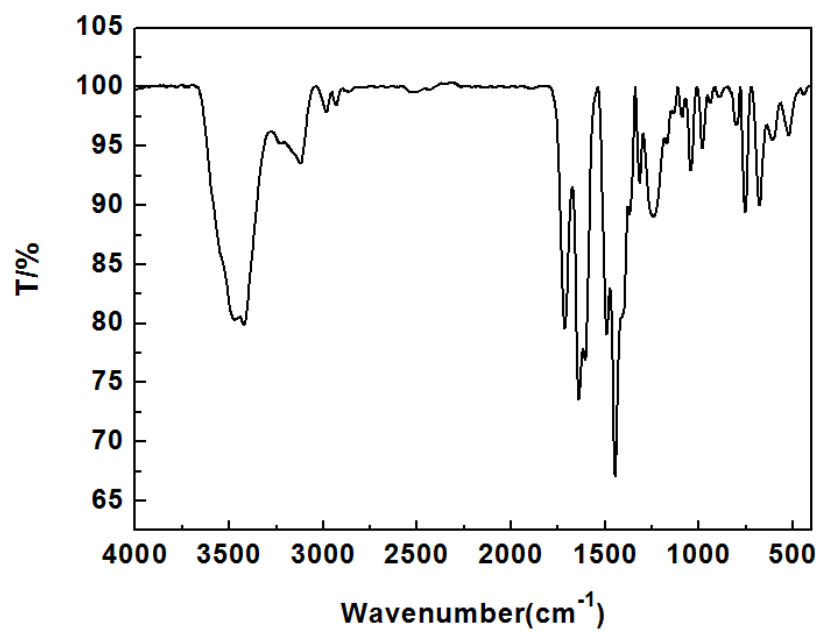

Fig. S2. IR absorption spectrum of complex 2

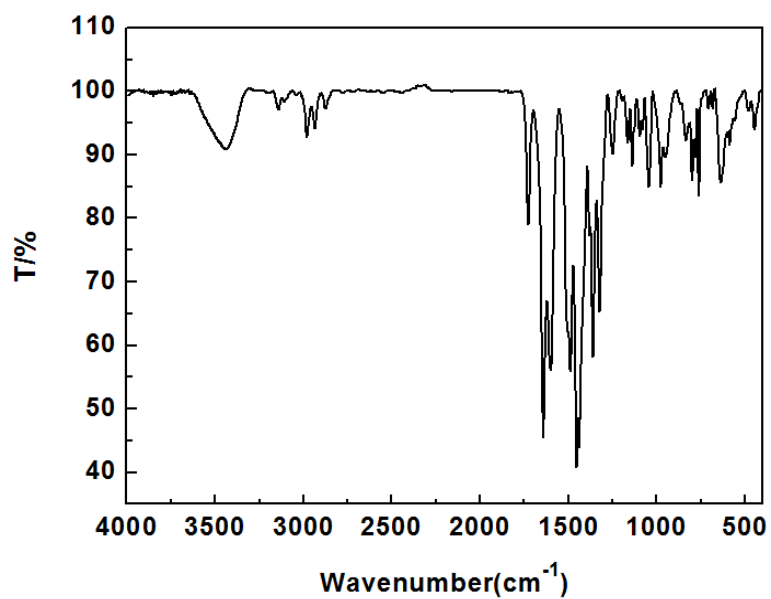

Fig. S3. IR absorption spectrum of complex 3

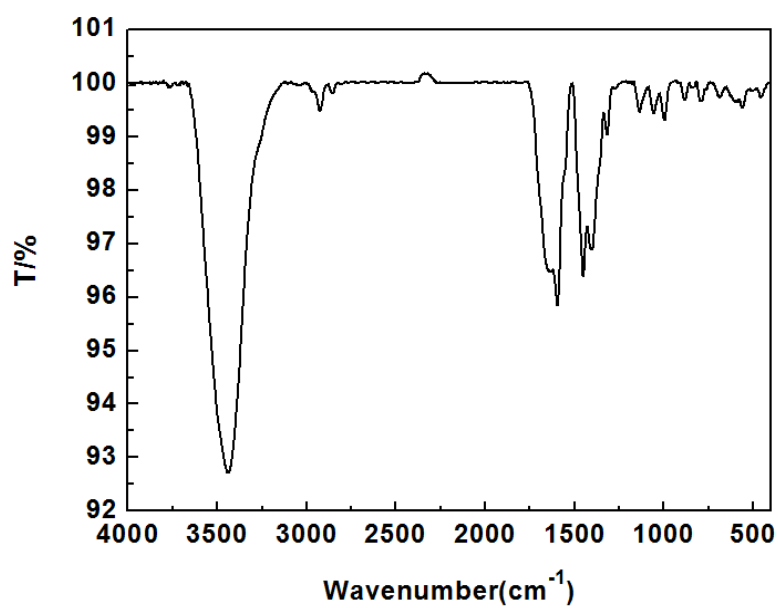

Fig. S4. IR absorption spectrum of complex 4

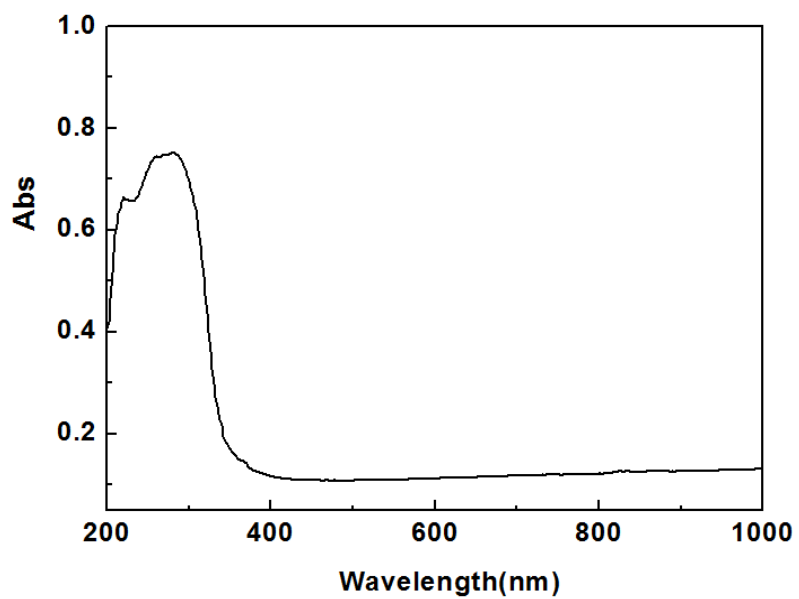

Fig. S5. UV-vis absorption spectrum of complex 1

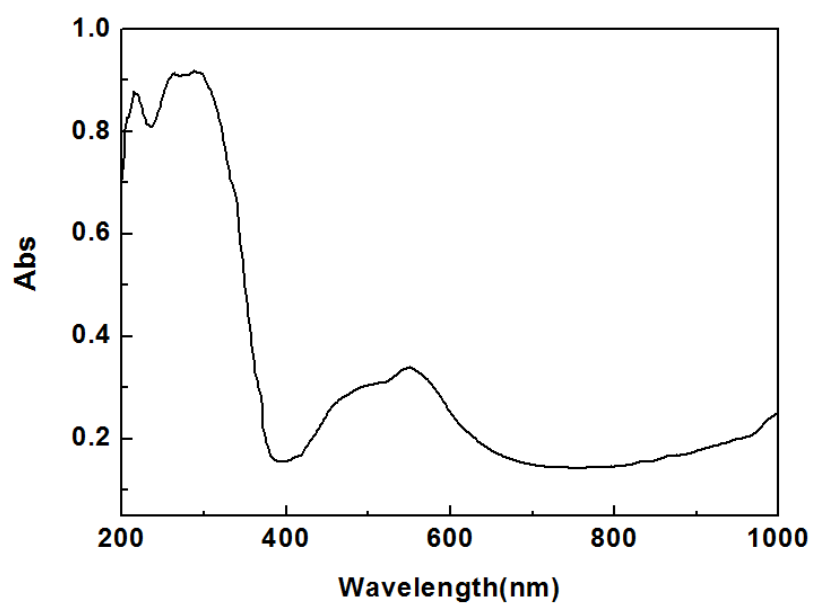

Fig. S6. UV-vis absorption spectrum of complex 2

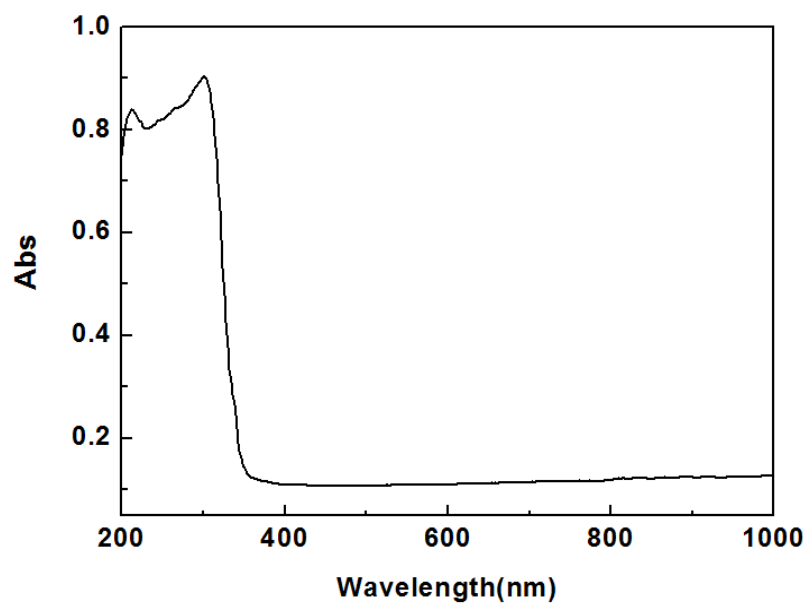

Fig. S7. UV-vis absorption spectrum of complex 3

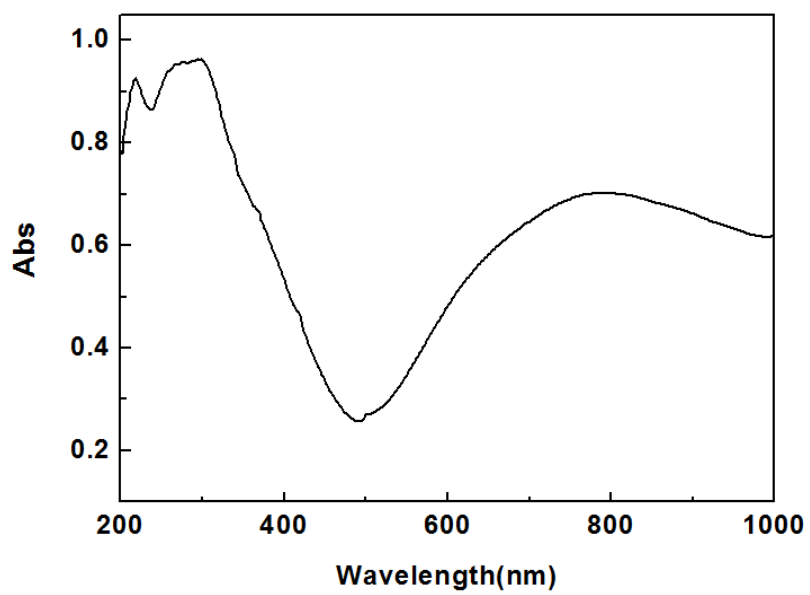

Fig. S8. UV-vis absorption spectrum of complex 4



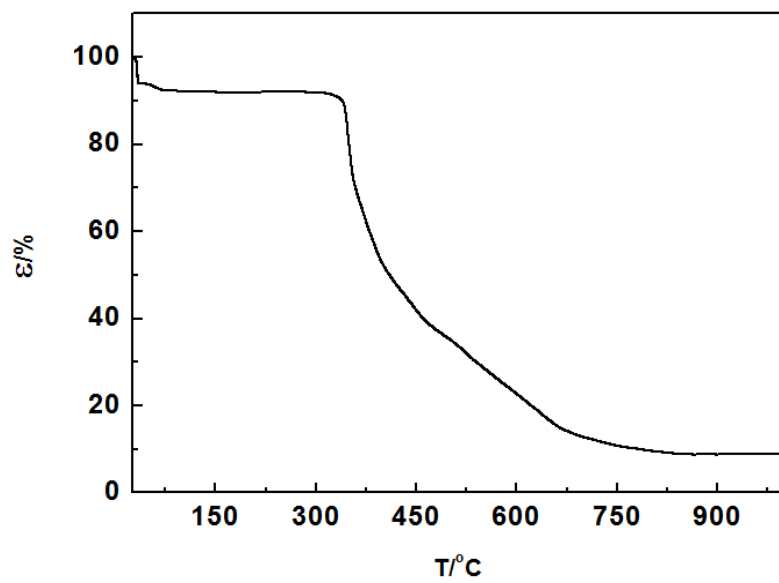

Fig. S9. TG curve of the complex 1

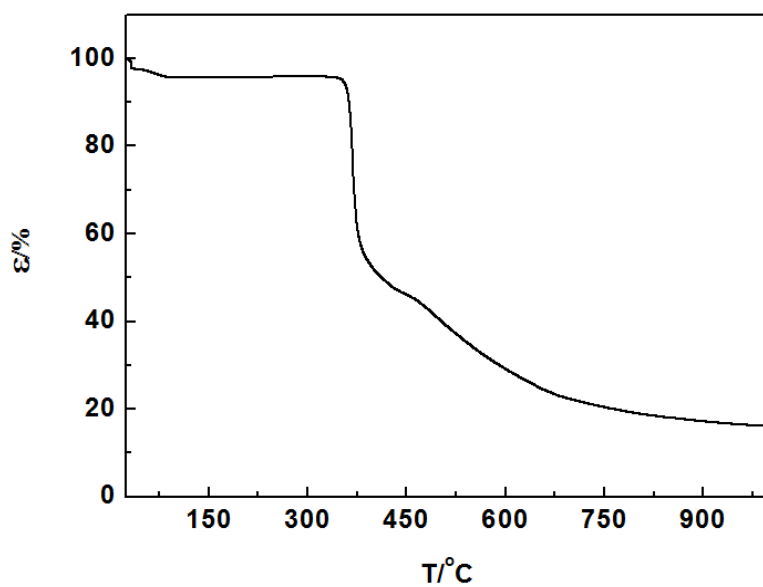

Fig. S10. TG curve of the complex 2

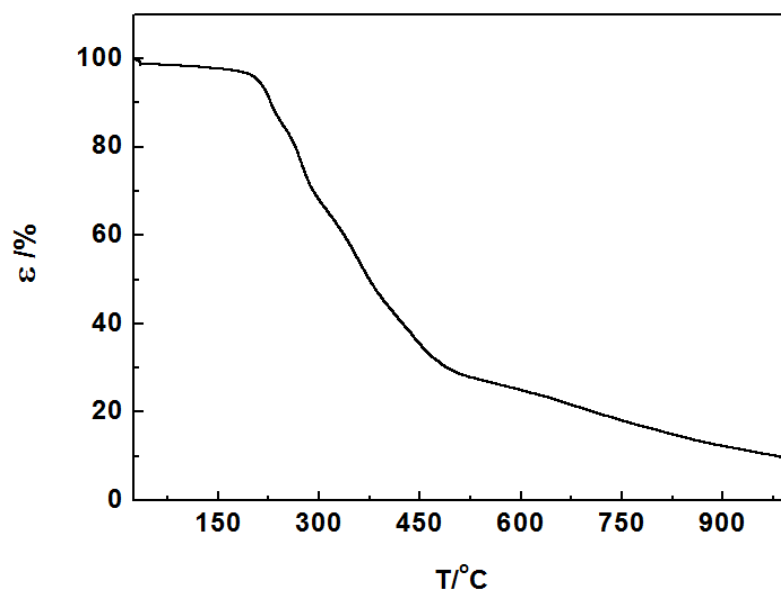

Fig. S11. TG curve of the complex 3

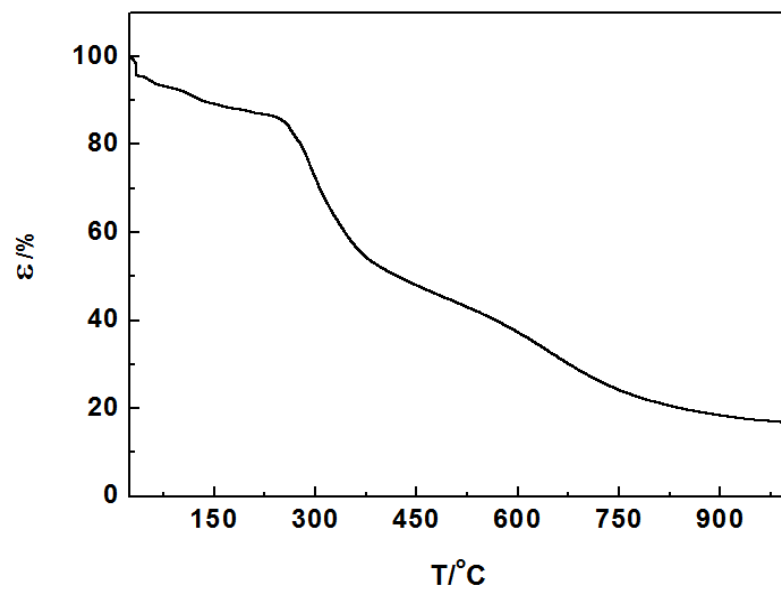

Fig. S12. TG curve of the complex 4

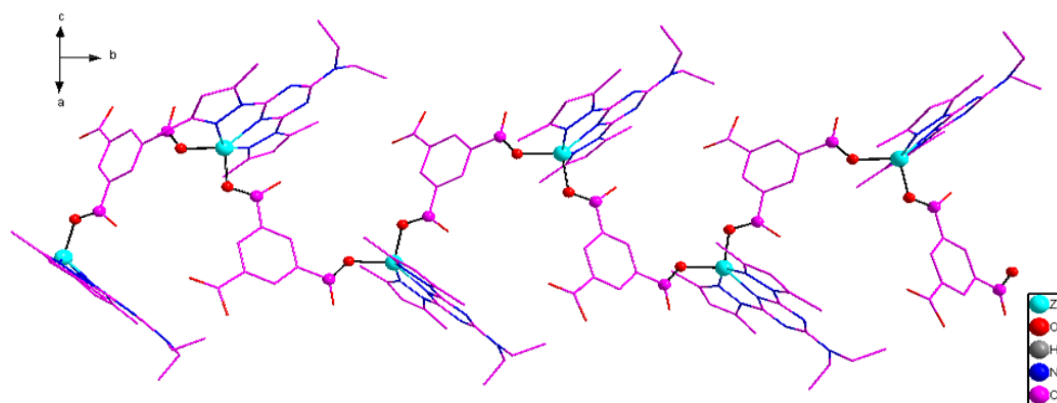

**Fig. S13.** The view of 1D chain of complex 1 (All H atoms are omitted for clarity)

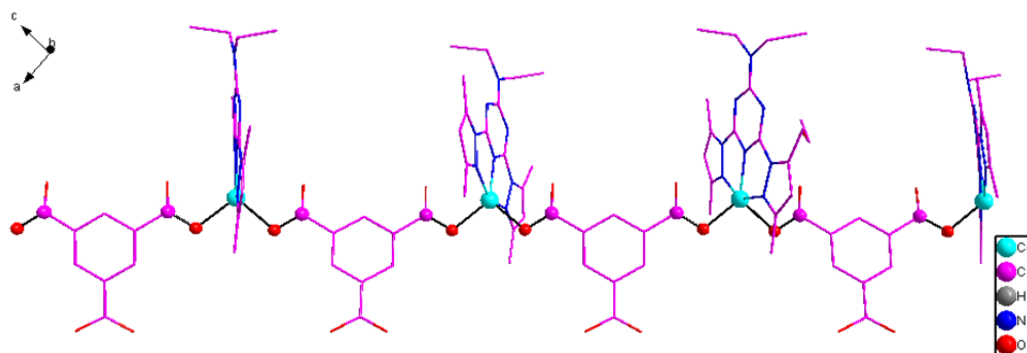

**Fig. S14.** The view of 1D chain in complex 2 (All H atoms are omitted for clarity)

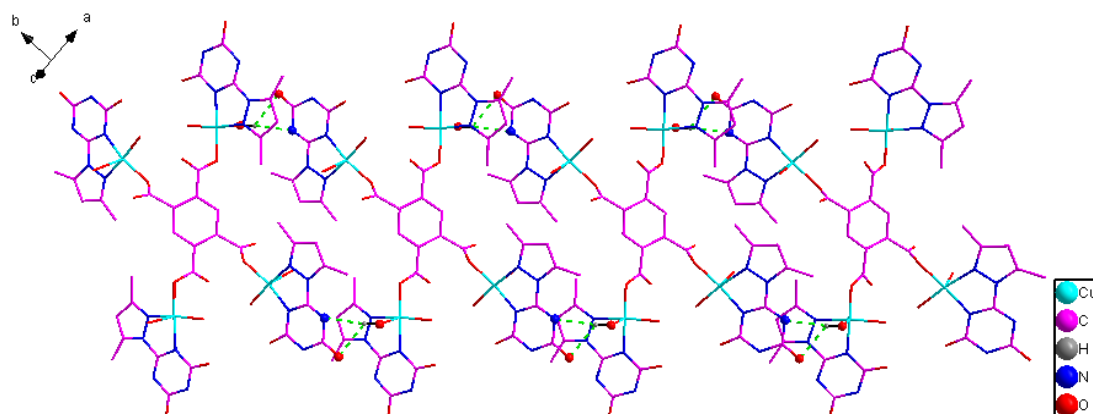

**Fig. S15.** The view of 1D chain via hydrogen bonds in complex 4 (All H atoms except for the hydrogen bonds are omitted for clarity; Symmetry codes: #4:  $-1+x, 1+y, z$ )

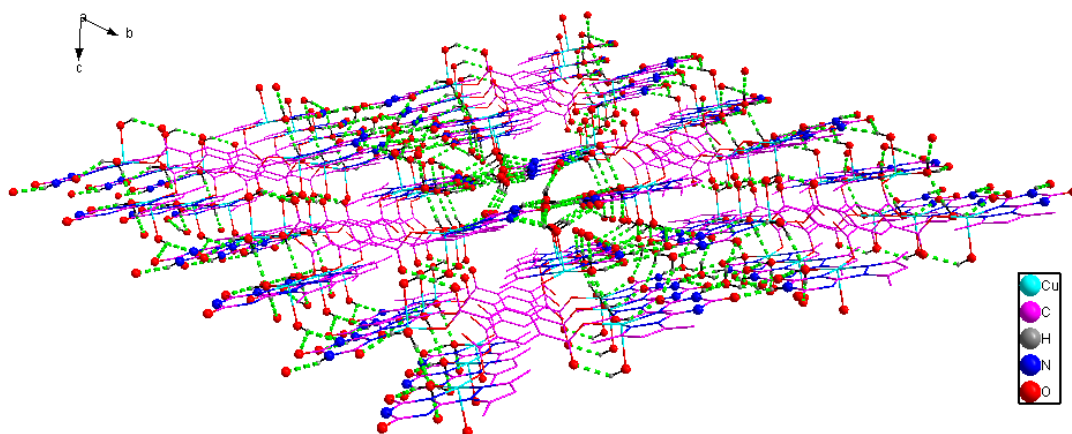

**Fig. S16.** The view of 3D network structure via hydrogen bonds in complex **4** (All H atoms except for the hydrogen bonds are omitted for clarity; Symmetry codes: #1:  $2-x, -y, 1-z$ ; #2:  $1+x, -1+y, z$ ; #3:  $1+x, y, z$ ; #4:  $-1+x, 1+y, z$ ; #5:  $1-x, 1-y, 1-z$ .)
